# Supplementary material for: Acetylation-mediated degradation of HSD17B4 regulates the progression of prostate cancer
Source: Aging (Albany NY). 2020 Jul 17;12(14):14699–717. doi: 10.18632/aging.103530 (PMC7425433; doi:10.18632/aging.103530)
Supplement: Supplementary Table 1 [file aging-12-103530-s001..xlsx]

## Sheet: Sheet1
Patients clinical data
Name	Gender	Age(year)	ID number	Diagnose	Gleason score	Grade	IHC results
Shengtao He	Male	68	1005459	Prostate Cancer	3+3=6	1	AR(+),PSA(+),Ki67(<5%+),P504S(++),ERG(++),P63(-).
Lieran Lin	Male	67	1295361	Prostate Cancer	3+4=7	2	AR(+),PSA(+),P63(-),Ki67(<3%+),P504S(+),ERG(-),CK-Pan(+).
Shaoyuan Zeng	Male	73	1349119	Prostate Cancer	4+4=8	4	AR(++),PSA(++),P63(-),Ki67(40%+),P504S(+),ERG(-),Syn(-),CgA(-),CK-Pan(-).
Qianshan Gong	Male	77	1325018	Prostate Cancer	3+3=6	1	P504S(++),ERG(++),P63(+).
Jianwei Wang	Male	54	1345636	Prostate Cancer	3+4=7	2	AR(+),PSA(+),P63(-),Ki67(1%+),P504S(+),ERG(+).
Caicheng Tang	Male	70	1345734	Prostate Cancer	3+3=6	1	P63(-),Ki67(25%+),P504S(+),34BE12(-).
Chenglan Xie	Male	61	1347905	Prostate Cancer	3+4=7	2	AR(+),PSA(+++),PSAP(++),P63(-),34BE12(-),Ki67(+),P504S(+).
Shaohai Luo	Male	54	1361950	Prostate Cancer	4+3=7	3	AR(+++),PSA(+++),PSAP(+),P63(-),34BE12(-),Ki67(+),P504S(++),ERG(+++).
Mingyi Wang	Male	56	1357956	Prostate Cancer	4+3=7	3	AR(+),PSA(+),PSAP(+),P63(-),34BE12(-),Ki67(+),P504S(+),ERG(-).
Xianglin Zhang	Male	65	1321308	Prostate Cancer	3+4=7	2	CD34(+),Bcl-2(-),STAT6(-),AR(+),PSA(+),P63(-),34BE12(-),Ki67(15%+),P504S(+).
