# Supplementary material for: Acetylation-mediated degradation of HSD17B4 regulates the progression of prostate cancer
Source: Aging (Albany NY). 2020 Jul 17;12(14):14699–717. doi: 10.18632/aging.103530 (PMC7425433; doi:10.18632/aging.103530)
Supplement: Supplementary Table 2 [file aging-12-103530-s002..xlsx]

## Sheet: Supplementary table 2
HSD17B4 mRNA expression in TCGA database
TCGA ID	HSD17B4	type
TCGA-EJ-7125-11	11.9489	Normal		Paratumor	Tumor
TCGA-EJ-7782-11	11.8465	Normal		11.9489	11.8557
TCGA-HC-8258-11	13.3107	Normal		11.8465	12.9635
TCGA-EJ-7328-11	11.4422	Normal		13.3107	12.5095
TCGA-HC-8260-11	11.7554	Normal		11.4422	11.7679
TCGA-EJ-7781-11	11.6365	Normal		11.7554	12.1484
TCGA-G9-6333-11	11.2545	Normal		11.6365	12.6483
TCGA-EJ-7330-11	11.6498	Normal		11.2545	12.8914
TCGA-EJ-7789-11	12.0813	Normal		11.6498	12.983
TCGA-EJ-7785-11	11.7499	Normal		12.0813	12.5205
TCGA-EJ-7331-11	12.0007	Normal		11.7499	11.8431
TCGA-HC-7740-11	13.0744	Normal		12.0007	12.0426
TCGA-EJ-7783-11	10.9685	Normal		13.0744	13.0743
TCGA-HC-7752-11	11.1247	Normal		10.9685	13.0544
TCGA-HC-7745-11	12.4743	Normal		11.1247	12.2806
TCGA-HC-7819-11	11.6059	Normal		12.4743	13.6011
TCGA-G9-6362-11	12.2619	Normal		11.6059	12.2332
TCGA-EJ-7793-11	11.9137	Normal		12.2619	13.0058
TCGA-CH-5768-11	11.6612	Normal		11.9137	12.133
TCGA-G9-6365-11	11.3756	Normal		11.6612	11.3995
TCGA-HC-8262-11	11.8366	Normal		11.3756	13.1892
TCGA-G9-6496-11	11.7026	Normal		11.8366	12.0476
TCGA-EJ-7794-11	11.704	Normal		11.7026	11.9782
TCGA-G9-6351-11	11.8118	Normal		11.704	11.5723
TCGA-G9-6342-11	11.7937	Normal		11.8118	12.3555
TCGA-G9-6499-11	13.1852	Normal		11.7937	13.0258
TCGA-CH-5767-11	11.6568	Normal		13.1852	12.0336
TCGA-EJ-A8FO-11	11.4259	Normal		11.6568	11.6106
TCGA-G9-6363-11	11.6919	Normal		11.4259	12.3891
TCGA-HC-7742-11	12.2546	Normal		11.6919	15.2693
TCGA-HC-7738-11	12.8762	Normal		12.2546	12.0378
TCGA-EJ-7327-11	12.221	Normal		12.8762	12.7022
TCGA-EJ-7792-11	11.7799	Normal		12.221	12.1796
TCGA-HC-8259-11	12.0768	Normal		11.7799	13.5316
TCGA-J4-A83J-11	11.2603	Normal		12.0768	13.8842
TCGA-EJ-7784-11	12.0071	Normal		11.2603	12.4088
TCGA-G9-6356-11	11.6128	Normal		12.0071	11.7697
TCGA-EJ-7317-11	12.3351	Normal		11.6128	11.7887
TCGA-EJ-7115-11	11.94	Normal		12.3351	13.8479
TCGA-G9-6348-11	10.9126	Normal		11.94	12.2066
TCGA-CH-5761-11	11.8612	Normal		10.9126	14.5268
TCGA-HC-7211-11	13.3764	Normal		11.8612	8.7567
TCGA-CH-5769-11	12.1062	Normal		13.3764	11.4767
TCGA-HC-7737-11	13.0149	Normal		12.1062	12.5797
TCGA-EJ-7321-11	11.8071	Normal		13.0149	11.3535
TCGA-G9-6384-11	11.3762	Normal		11.8071	12.5395
TCGA-HC-7747-11	13.3422	Normal		11.3762	14.0954
TCGA-EJ-7786-11	11.7045	Normal		13.3422	12.0741
TCGA-EJ-7315-11	11.5699	Normal		11.7045	13.4374
TCGA-EJ-7797-11	11.8224	Normal		11.5699	12.1118
TCGA-EJ-7123-11	10.9145	Normal		11.8224	13.2198
TCGA-EJ-7314-11	12.0622	Normal		10.9145	12.8122
TCGA-XJ-A83F-01	11.8557	Tumor		12.0622	12.1293
TCGA-G9-6348-01	12.9635	Tumor			12.798
TCGA-CH-5766-01	12.5095	Tumor			11.7915
TCGA-EJ-A65G-01	11.7679	Tumor			13.6503
TCGA-G9-6354-01	12.1484	Tumor			13.001
TCGA-EJ-5527-01	12.6483	Tumor			11.4628
TCGA-HC-8213-01	12.8914	Tumor			13.6004
TCGA-Y6-A9XI-01	12.983	Tumor			11.4218
TCGA-CH-5744-01	12.5205	Tumor			12.0853
TCGA-HC-A9TE-01	11.8431	Tumor			13.2461
TCGA-EJ-A7NJ-01	12.0426	Tumor			12.0554
TCGA-SU-A7E7-01	13.0743	Tumor			13.5431
TCGA-CH-5772-01	13.0544	Tumor			11.6671
TCGA-HI-7168-01	12.2806	Tumor			12.4377
TCGA-ZG-A9L0-01	13.6011	Tumor			11.9658
TCGA-HC-7075-01	12.2332	Tumor			11.8803
TCGA-V1-A9Z8-01	13.0058	Tumor			12.1352
TCGA-KK-A7AW-01	12.133	Tumor			12.2914
TCGA-H9-A6BX-01	11.3995	Tumor			12.7295
TCGA-YL-A9WY-01	13.1892	Tumor			12.2725
TCGA-EJ-8469-01	12.0476	Tumor			11.9693
TCGA-G9-6361-01	11.9782	Tumor			12.4004
TCGA-HI-7171-01	11.5723	Tumor			11.6144
TCGA-ZG-A8QY-01	12.3555	Tumor			11.0548
TCGA-J9-A8CM-01	13.0258	Tumor			12.99
TCGA-J9-A52C-01	12.0336	Tumor			13.5655
TCGA-EJ-A65D-01	11.6106	Tumor			11.9395
TCGA-G9-6336-01	12.3891	Tumor			13.9323
TCGA-V1-A9O5-06	15.2693	Tumor			13.3476
TCGA-J4-A67K-01	12.0378	Tumor			12.3654
TCGA-2A-A8W1-01	12.7022	Tumor			12.1237
TCGA-HC-7819-01	12.1796	Tumor			12.1333
TCGA-VN-A88N-01	13.5316	Tumor			11.8173
TCGA-VP-A87J-01	13.8842	Tumor			11.6221
TCGA-2A-A8VL-01	12.4088	Tumor			11.9106
TCGA-EJ-A46D-01	11.7697	Tumor			11.8474
TCGA-HC-7821-01	11.7887	Tumor			12.9008
TCGA-HC-A8CY-01	13.8479	Tumor			12.2116
TCGA-EJ-7315-01	12.2066	Tumor			11.7995
TCGA-FC-A5OB-01	14.5268	Tumor			11.3781
TCGA-V1-A9ZI-01	8.7567	Tumor			12.0975
TCGA-FC-A66V-01	11.4767	Tumor			12.2238
TCGA-ZG-A9LS-01	12.5797	Tumor			11.8312
TCGA-J9-A52E-01	11.3535	Tumor			12.4676
TCGA-G9-6362-01	12.5395	Tumor			12.4491
TCGA-KK-A59X-01	14.0954	Tumor			11.9844
TCGA-M7-A723-01	12.0741	Tumor			12.8368
TCGA-HC-A6AL-01	13.4374	Tumor			12.081
TCGA-EJ-A8FN-01	12.1118	Tumor			12.3368
TCGA-XK-AAJA-01	13.2198	Tumor			12.3672
TCGA-EJ-5531-01	12.8122	Tumor			12.3301
TCGA-EJ-A6RC-01	12.1293	Tumor			11.3577
TCGA-2A-A8W3-01	12.798	Tumor			12.9953
TCGA-EJ-A46B-01	11.7915	Tumor			13.0714
TCGA-KK-A8IK-01	13.6503	Tumor			11.697
TCGA-XK-AAIR-01	13.001	Tumor			13.1244
TCGA-J9-A8CK-01	11.4628	Tumor			12.1615
TCGA-EJ-8470-01	13.6004	Tumor			11.8858
TCGA-KK-A7B4-01	11.4218	Tumor			12.7746
TCGA-EJ-5499-01	12.0853	Tumor			12.0948
TCGA-KK-A7AP-01	13.2461	Tumor			12.6741
TCGA-CH-5764-01	12.0554	Tumor			12.6545
TCGA-EJ-7789-01	13.5431	Tumor			12.8609
TCGA-J4-AAU2-01	11.6671	Tumor			14.0035
TCGA-XQ-A8TB-01	12.4377	Tumor			12.0457
TCGA-VP-A87E-01	11.9658	Tumor			12.8576
TCGA-EJ-7793-01	11.8803	Tumor			12.1769
TCGA-YL-A9WI-01	12.1352	Tumor			12.2622
TCGA-EJ-7321-01	12.2914	Tumor			12.58
TCGA-KK-A8I7-01	12.7295	Tumor			12.8237
TCGA-ZG-A9L4-01	12.2725	Tumor			13.4307
TCGA-CH-5789-01	11.9693	Tumor			12.246
TCGA-YL-A8HK-01	12.4004	Tumor			12.4226
TCGA-G9-6329-01	11.6144	Tumor			12.3885
TCGA-XQ-A8TA-01	11.0548	Tumor			11.2294
TCGA-2A-AAYU-01	12.99	Tumor			12.0623
TCGA-HC-8261-01	13.5655	Tumor			11.2349
TCGA-EJ-5503-01	11.9395	Tumor			12.568
TCGA-KK-A5A1-01	13.9323	Tumor			12.1849
TCGA-EJ-8468-01	13.3476	Tumor			13.2565
TCGA-EJ-7782-01	12.3654	Tumor			11.8325
TCGA-HC-7212-01	12.1237	Tumor			12.5505
TCGA-KK-A7AQ-01	12.1333	Tumor			12.9023
TCGA-EJ-7791-01	11.8173	Tumor			12.5379
TCGA-J4-A83K-01	11.6221	Tumor			12.334
TCGA-VN-A88Q-01	11.9106	Tumor			12.3555
TCGA-EJ-5498-01	11.8474	Tumor			12.0222
TCGA-ZG-A9LY-01	12.9008	Tumor			11.4804
TCGA-VP-A876-01	12.2116	Tumor			11.2409
TCGA-V1-A8MK-01	11.7995	Tumor			12.8993
TCGA-YL-A8SF-01	11.3781	Tumor			11.7894
TCGA-KK-A8I8-01	12.0975	Tumor			13.506
TCGA-KK-A7AV-01	12.2238	Tumor			12.478
TCGA-YL-A8SI-01	11.8312	Tumor			12.6148
TCGA-TK-A8OK-01	12.4676	Tumor			11.9893
TCGA-EJ-5508-01	12.4491	Tumor			11.7484
TCGA-VP-A879-01	11.9844	Tumor			12.6938
TCGA-ZG-A9L1-01	12.8368	Tumor			11.2554
TCGA-KK-A6E3-01	12.081	Tumor			13.1588
TCGA-G9-6342-01	12.3368	Tumor			12.0343
TCGA-EJ-5515-01	12.3672	Tumor			11.8136
TCGA-G9-6364-01	12.3301	Tumor			13.1948
TCGA-G9-6332-01	11.3577	Tumor			12.1978
TCGA-YL-A8SR-01	12.9953	Tumor			12.0098
TCGA-KK-A6E5-01	13.0714	Tumor			12.1042
TCGA-EJ-7783-01	11.697	Tumor			13.161
TCGA-J4-A83I-01	13.1244	Tumor			11.6739
TCGA-KK-A8II-01	12.1615	Tumor			12.18
TCGA-CH-5743-01	11.8858	Tumor			11.6701
TCGA-EJ-5509-01	12.7746	Tumor			12.024
TCGA-KK-A59V-01	12.0948	Tumor			11.299
TCGA-CH-5771-01	12.6741	Tumor			11.7605
TCGA-J4-A83N-01	12.6545	Tumor			11.9853
TCGA-EJ-8472-01	12.8609	Tumor			13.0724
TCGA-EJ-A65E-01	14.0035	Tumor			12.2648
TCGA-YL-A8HJ-01	12.0457	Tumor			12.8685
TCGA-XK-AAIW-01	12.8576	Tumor			12.4381
TCGA-V1-A9Z7-01	12.1769	Tumor			12.5363
TCGA-HC-8259-01	12.2622	Tumor			12.34
TCGA-VP-A87H-01	12.58	Tumor			11.7094
TCGA-J4-A67M-01	12.8237	Tumor			12.97
TCGA-KK-A6E0-01	13.4307	Tumor			11.4694
TCGA-HC-7738-01	12.246	Tumor			12.1882
TCGA-EJ-5517-01	12.4226	Tumor			12.0702
TCGA-VP-A872-01	12.3885	Tumor			12.2807
TCGA-VN-A88I-01	11.2294	Tumor			12.5613
TCGA-KK-A7B2-01	12.0623	Tumor			12.1116
TCGA-KC-A4BR-01	11.2349	Tumor			12.3305
TCGA-YL-A9WK-01	12.568	Tumor			12.4363
TCGA-EJ-5514-01	12.1849	Tumor			11.1854
TCGA-G9-7521-01	13.2565	Tumor			14.0764
TCGA-V1-A8MF-01	11.8325	Tumor			12.9905
TCGA-MG-AAMC-01	12.5505	Tumor			12.2896
TCGA-VN-A88P-01	12.9023	Tumor			12.3729
TCGA-HC-7736-01	12.5379	Tumor			12.3344
TCGA-YL-A8SQ-01	12.334	Tumor			13.0793
TCGA-EJ-A65B-01	12.3555	Tumor			12.2234
TCGA-VN-A88K-01	12.0222	Tumor			12.9709
TCGA-EJ-A46H-01	11.4804	Tumor			13.4168
TCGA-CH-5761-01	11.2409	Tumor			12.1178
TCGA-J4-A83M-01	12.8993	Tumor			12.069
TCGA-EJ-A65F-01	11.7894	Tumor			12.7671
TCGA-ZG-A9KY-01	13.506	Tumor			13.1946
TCGA-KK-A8IG-01	12.478	Tumor			11.7339
TCGA-CH-5738-01	12.6148	Tumor			12.3302
TCGA-G9-A9S4-01	11.9893	Tumor			12.1309
TCGA-J4-8198-01	11.7484	Tumor			12.9022
TCGA-CH-5745-01	12.6938	Tumor			11.4374
TCGA-EJ-7784-01	11.2554	Tumor			12.704
TCGA-V1-A9OH-01	13.1588	Tumor			11.931
TCGA-G9-6343-01	12.0343	Tumor			11.9855
TCGA-EJ-7327-01	11.8136	Tumor			11.6428
TCGA-KK-A7B3-01	13.1948	Tumor			11.8394
TCGA-G9-6363-01	12.1978	Tumor			13.405
TCGA-XK-AAJR-01	12.0098	Tumor			11.7933
TCGA-M7-A722-01	12.1042	Tumor			11.9428
TCGA-HC-7817-01	13.161	Tumor			12.1588
TCGA-KK-A6E2-01	11.6739	Tumor			12.3221
TCGA-HC-8260-01	12.18	Tumor			12.0534
TCGA-G9-6367-01	11.6701	Tumor			13.0928
TCGA-G9-6369-01	12.024	Tumor			11.9932
TCGA-G9-6338-01	11.299	Tumor			11.9297
TCGA-XK-AAJU-01	11.7605	Tumor			11.4908
TCGA-EJ-7786-01	11.9853	Tumor			11.771
TCGA-HC-7209-01	13.0724	Tumor			11.3254
TCGA-CH-5792-01	12.2648	Tumor			13.0417
TCGA-CH-5751-01	12.8685	Tumor			12.9705
TCGA-HC-A4ZV-01	12.4381	Tumor			11.6854
TCGA-J4-8200-01	12.5363	Tumor			13.0059
TCGA-2A-AAYO-01	12.34	Tumor			11.8455
TCGA-HC-A632-01	11.7094	Tumor			12.7027
TCGA-EJ-5519-01	12.97	Tumor			12.5577
TCGA-YL-A8SK-01	11.4694	Tumor			12.1633
TCGA-J4-AATV-01	12.1882	Tumor			12.6394
TCGA-HI-7170-01	12.0702	Tumor			12.9397
TCGA-CH-5752-01	12.2807	Tumor			11.682
TCGA-EJ-7312-01	12.5613	Tumor			13.5872
TCGA-KK-A6DY-01	12.1116	Tumor			12.2411
TCGA-G9-6384-01	12.3305	Tumor			11.1046
TCGA-CH-5767-01	12.4363	Tumor			13.0684
TCGA-YL-A9WL-01	11.1854	Tumor			13.6546
TCGA-ZG-A9LB-01	14.0764	Tumor			12.7022
TCGA-HC-7744-01	12.9905	Tumor			11.1626
TCGA-H9-7775-01	12.2896	Tumor			12.298
TCGA-KC-A4BN-01	12.3729	Tumor			11.5827
TCGA-KK-A7B1-01	12.3344	Tumor			12.5944
TCGA-EJ-7123-01	13.0793	Tumor			12.7808
TCGA-CH-5746-01	12.2234	Tumor			12.9919
TCGA-V1-A8MJ-01	12.9709	Tumor			12.0917
TCGA-J4-AATZ-01	13.4168	Tumor			12.5726
TCGA-HC-A76X-01	12.1178	Tumor			12.2265
TCGA-CH-5763-01	12.069	Tumor			12.3124
TCGA-G9-7523-01	12.7671	Tumor			12.7059
TCGA-EJ-A7NM-01	13.1946	Tumor			12.0124
TCGA-VP-A878-01	11.7339	Tumor			13.2247
TCGA-EJ-7115-01	12.3302	Tumor			12.1816
TCGA-EJ-5530-01	12.1309	Tumor			12.1784
TCGA-EJ-A7NN-01	12.9022	Tumor			14.7254
TCGA-EJ-A7NH-01	11.4374	Tumor			12.9705
TCGA-CH-5762-01	12.704	Tumor			12.0935
TCGA-G9-6365-01	11.931	Tumor			11.8727
TCGA-CH-5741-01	11.9855	Tumor			11.8569
TCGA-EJ-5512-01	11.6428	Tumor			13.619
TCGA-V1-A9OQ-01	11.8394	Tumor			12.9116
TCGA-EJ-8474-01	13.405	Tumor			12.1196
TCGA-EJ-7328-01	11.7933	Tumor			11.8696
TCGA-M7-A71Y-01	11.9428	Tumor			10.0305
TCGA-CH-5740-01	12.1588	Tumor			13.266
TCGA-EJ-5521-01	12.3221	Tumor			12.5666
TCGA-EJ-5494-01	12.0534	Tumor			13.5001
TCGA-V1-A9OF-01	13.0928	Tumor			12.2312
TCGA-HC-7747-01	11.9932	Tumor			12.8744
TCGA-HC-7820-01	11.9297	Tumor			12.5886
TCGA-EJ-5525-01	11.4908	Tumor			13.036
TCGA-4L-AA1F-01	11.771	Tumor			13.1765
TCGA-EJ-7325-01	11.3254	Tumor			13.1572
TCGA-KK-A8I5-01	13.0417	Tumor			11.8633
TCGA-ZG-A9L5-01	12.9705	Tumor			12.5687
TCGA-G9-7525-01	11.6854	Tumor			10.9133
TCGA-XA-A8JR-01	13.0059	Tumor			12.1733
TCGA-HC-8257-01	11.8455	Tumor			12.2505
TCGA-KK-A8ID-01	12.7027	Tumor			12.6784
TCGA-YL-A9WJ-01	12.5577	Tumor			11.0364
TCGA-EJ-A6RA-01	12.1633	Tumor			13.2204
TCGA-CH-5794-01	12.6394	Tumor			14.1282
TCGA-FC-A6HD-01	12.9397	Tumor			12.8993
TCGA-EJ-A7NG-01	11.682	Tumor			13.7356
TCGA-EJ-A65J-01	13.5872	Tumor			11.1796
TCGA-J4-A67T-01	12.2411	Tumor			13.7228
TCGA-V1-A8WV-01	11.1046	Tumor			12.821
TCGA-V1-A9Z9-01	13.0684	Tumor			12.3949
TCGA-V1-A9OL-01	13.6546	Tumor			12.4206
TCGA-G9-7519-01	12.7022	Tumor			10.8779
TCGA-ZG-A9MC-01	11.1626	Tumor			12.0309
TCGA-VN-A943-01	12.298	Tumor			12.8329
TCGA-FC-A4JI-01	11.5827	Tumor			12.6825
TCGA-HC-8264-01	12.5944	Tumor			13.7343
TCGA-EJ-5507-01	12.7808	Tumor			10.4851
TCGA-EJ-5495-01	12.9919	Tumor			12.2488
TCGA-J9-A52D-01	12.0917	Tumor			12.8511
TCGA-V1-A8MU-01	12.5726	Tumor			11.5077
TCGA-EJ-5497-01	12.2265	Tumor			14.585
TCGA-G9-6378-01	12.3124	Tumor			11.8021
TCGA-EJ-7797-01	12.7059	Tumor			11.9044
TCGA-ZG-A9L6-01	12.0124	Tumor			11.1714
TCGA-HC-A631-01	13.2247	Tumor			11.4114
TCGA-V1-A8WS-01	12.1816	Tumor			12.3782
TCGA-HC-A6AS-01	12.1784	Tumor			11.859
TCGA-J9-A8CP-01	14.7254	Tumor			11.505
TCGA-YL-A8HL-01	12.9705	Tumor			15.2495
TCGA-EJ-A7NF-01	12.0935	Tumor			12.4958
TCGA-EJ-7218-01	11.8727	Tumor			11.7864
TCGA-HC-7740-01	11.8569	Tumor			12.9207
TCGA-KK-A7AY-01	13.619	Tumor			12.5515
TCGA-CH-5790-01	12.9116	Tumor			12.6373
TCGA-CH-5769-01	12.1196	Tumor			12.368
TCGA-WW-A8ZI-01	11.8696	Tumor			12.3953
TCGA-G9-6347-01	10.0305	Tumor			12.6891
TCGA-KK-A8IF-01	13.266	Tumor			12.787
TCGA-2A-A8VX-01	12.5666	Tumor			13.7362
TCGA-HC-7233-01	13.5001	Tumor			12.8826
TCGA-Y6-A8TL-01	12.2312	Tumor			11.9069
TCGA-XK-AAJP-01	12.8744	Tumor			12.7016
TCGA-HC-7748-01	12.5886	Tumor			12.5384
TCGA-XJ-A83H-01	13.036	Tumor			11.8554
TCGA-KC-A7FD-01	13.1765	Tumor			11.5014
TCGA-FC-7961-01	13.1572	Tumor			12.7016
TCGA-EJ-A8FP-01	11.8633	Tumor			11.3962
TCGA-G9-A9S0-01	12.5687	Tumor			12.2974
TCGA-V1-A9OT-01	10.9133	Tumor			12.7369
TCGA-ZG-A9N3-01	12.1733	Tumor			11.4001
TCGA-VN-A88M-01	12.2505	Tumor			10.8369
TCGA-CH-5750-01	12.6784	Tumor			12.3697
TCGA-ZG-A9LU-01	11.0364	Tumor			12.4513
TCGA-J9-A8CL-01	13.2204	Tumor			13.1143
TCGA-HC-A6AO-01	14.1282	Tumor			11.3466
TCGA-VP-AA1N-01	12.8993	Tumor			11.7661
TCGA-KK-A6E7-01	13.7356	Tumor			12.1582
TCGA-KC-A7F6-01	11.1796	Tumor			12.9682
TCGA-HC-7211-01	13.7228	Tumor			13.1251
TCGA-KC-A4BV-01	12.821	Tumor			13.8338
TCGA-KK-A8IH-01	12.3949	Tumor			11.4848
TCGA-2A-A8VV-01	12.4206	Tumor			13.3712
TCGA-QU-A6IM-01	10.8779	Tumor			11.9952
TCGA-XK-AAJT-01	12.0309	Tumor			11.1519
TCGA-HC-7210-01	12.8329	Tumor			11.536
TCGA-ZG-A8QZ-01	12.6825	Tumor			12.1919
TCGA-ZG-A9ND-01	13.7343	Tumor			12.8394
TCGA-J4-A67O-01	10.4851	Tumor			11.4882
TCGA-XK-AAJ3-01	12.2488	Tumor			12.8069
TCGA-YL-A8SB-01	12.8511	Tumor			11.821
TCGA-G9-6385-01	11.5077	Tumor			12.1941
TCGA-YL-A8HM-01	14.585	Tumor			12.8754
TCGA-X4-A8KS-01	11.8021	Tumor			12.3982
TCGA-EJ-7785-01	11.9044	Tumor			12.1195
TCGA-HC-7752-01	11.1714	Tumor			11.7235
TCGA-YL-A8SP-01	11.4114	Tumor			11.4816
TCGA-EJ-5526-01	12.3782	Tumor			12.5658
TCGA-EJ-7314-01	11.859	Tumor			12.3441
TCGA-J4-A67S-01	11.505	Tumor			11.1616
TCGA-YJ-A8SW-01	15.2495	Tumor			12.1126
TCGA-V1-A9ZG-01	12.4958	Tumor			13.8458
TCGA-FC-A8O0-01	11.7864	Tumor			13.3318
TCGA-ZG-A9NI-01	12.9207	Tumor			12.1154
TCGA-G9-7510-01	12.5515	Tumor			12.5945
TCGA-EJ-5502-01	12.6373	Tumor			12.9187
TCGA-YL-A8S8-01	12.368	Tumor			12.5451
TCGA-X4-A8KQ-01	12.3953	Tumor			12.9194
TCGA-EJ-5516-01	12.6891	Tumor			11.7931
TCGA-CH-5748-01	12.787	Tumor			12.7063
TCGA-HC-7078-01	13.7362	Tumor			12.6938
TCGA-ZG-A8QX-01	12.8826	Tumor			11.0037
TCGA-HC-7230-01	11.9069	Tumor			11.8374
TCGA-EJ-5542-01	12.7016	Tumor			12.7337
TCGA-KK-A8I9-01	12.5384	Tumor			14.2813
TCGA-HC-8266-01	11.8554	Tumor			11.7708
TCGA-G9-6370-01	11.5014	Tumor			12.9986
TCGA-HC-7080-01	12.7016	Tumor			11.8544
TCGA-G9-6353-01	11.3962	Tumor			12.2741
TCGA-HC-8262-01	12.2974	Tumor			12.9203
TCGA-G9-6333-01	12.7369	Tumor			12.6168
TCGA-EJ-A46I-01	11.4001	Tumor			12.7481
TCGA-EJ-AB20-01	10.8369	Tumor			12.7472
TCGA-M7-A724-01	12.3697	Tumor			12.5149
TCGA-CH-5768-01	12.4513	Tumor			12.7097
TCGA-G9-6494-01	13.1143	Tumor			11.0202
TCGA-CH-5788-01	11.3466	Tumor			12.0024
TCGA-J4-A6M7-01	11.7661	Tumor			12.1863
TCGA-EJ-A8FU-01	12.1582	Tumor			13.7129
TCGA-M7-A721-01	12.9682	Tumor			13.1258
TCGA-G9-6496-01	13.1251	Tumor			11.9272
TCGA-TP-A8TV-01	13.8338	Tumor			13.078
TCGA-QU-A6IP-01	11.4848	Tumor			13.2122
TCGA-J9-A8CN-01	13.3712	Tumor			12.1965
TCGA-EJ-5524-01	11.9952	Tumor			10.8874
TCGA-G9-6498-01	11.1519	Tumor			11.6838
TCGA-HC-A8D0-01	11.536	Tumor			12.0514
TCGA-V1-A8WN-01	12.1919	Tumor			13.3952
TCGA-EJ-7318-01	12.8394	Tumor			12.5401
TCGA-HC-7750-01	11.4882	Tumor			11.1734
TCGA-EJ-A65M-01	12.8069	Tumor			12.1831
TCGA-ZG-A8QW-01	11.821	Tumor			13.2336
TCGA-CH-5754-01	12.1941	Tumor			12.0387
TCGA-EJ-5522-01	12.8754	Tumor			12.5466
TCGA-HC-8265-01	12.3982	Tumor			12.6233
TCGA-EJ-5501-01	12.1195	Tumor			12.3594
TCGA-YL-A8SJ-01	11.7235	Tumor			12.3589
TCGA-ZG-A9L2-01	11.4816	Tumor			14.5907
TCGA-YL-A8HO-01	12.5658	Tumor			13.0957
TCGA-YL-A8SL-01	12.3441	Tumor			12.1327
TCGA-EJ-A46G-01	11.1616	Tumor			11.8769
TCGA-M7-A720-01	12.1126	Tumor			13.0599
TCGA-M7-A725-01	13.8458	Tumor			11.5614
TCGA-CH-5753-01	13.3318	Tumor			13.0248
TCGA-V1-A9O9-01	12.1154	Tumor			11.8394
TCGA-EJ-7125-01	12.5945	Tumor			11.8363
TCGA-G9-7522-01	12.9187	Tumor			11.7401
TCGA-XK-AAK1-01	12.5451	Tumor			11.9742
TCGA-G9-A9S7-01	12.9194	Tumor			12.5859
TCGA-EJ-A8FS-01	11.7931	Tumor			12.5716
TCGA-G9-6366-01	12.7063	Tumor			12.8478
TCGA-KC-A7F3-01	12.6938	Tumor			12.0727
TCGA-XJ-A9DI-01	11.0037	Tumor			12.8002
TCGA-XJ-A9DK-01	11.8374	Tumor			13.373
TCGA-HC-8256-01	12.7337	Tumor			11.662
TCGA-KK-A59Z-01	14.2813	Tumor			13.3609
TCGA-KK-A7AU-01	11.7708	Tumor			12.9476
TCGA-EJ-7331-01	12.9986	Tumor			12.1715
TCGA-VP-A875-01	11.8544	Tumor			12.3043
TCGA-ZG-A9M4-01	12.2741	Tumor			13.1262
TCGA-V1-A8MM-01	12.9203	Tumor			12.6052
TCGA-EJ-5532-01	12.6168	Tumor			12.7743
TCGA-KK-A8IL-01	12.7481	Tumor			12.6716
TCGA-ZG-A9LM-01	12.7472	Tumor			11.7232
TCGA-V1-A8X3-01	12.5149	Tumor			12.4423
TCGA-EJ-5518-01	12.7097	Tumor			13.0541
TCGA-QU-A6IL-01	11.0202	Tumor			11.0721
TCGA-2A-A8VT-01	12.0024	Tumor			11.9582
TCGA-HC-7081-01	12.1863	Tumor			12.0537
TCGA-YL-A8SC-01	13.7129	Tumor			12.7675
TCGA-J4-A83J-01	13.1258	Tumor			12.2819
TCGA-J4-A6G1-01	11.9272	Tumor			12.1908
TCGA-HC-7231-01	13.078	Tumor			12.0302
TCGA-G9-6339-01	13.2122	Tumor			12.4423
TCGA-HC-7232-01	12.1965	Tumor			11.7428
TCGA-HC-A6HX-01	10.8874	Tumor			12.4083
TCGA-XJ-A9DQ-01	11.6838	Tumor			12.8468
TCGA-G9-6351-01	12.0514	Tumor			12.9467
TCGA-EJ-5510-01	13.3952	Tumor			10.6046
TCGA-VP-A87D-01	12.5401	Tumor			11.763
TCGA-QU-A6IO-01	11.1734	Tumor			11.0892
TCGA-EJ-7792-01	12.1831	Tumor			12.585
TCGA-KK-A8IJ-01	13.2336	Tumor			12.3101
TCGA-G9-7509-01	12.0387	Tumor			13.0308
TCGA-CH-5765-01	12.5466	Tumor			11.8633
TCGA-KK-A6E1-01	12.6233	Tumor			12.538
TCGA-CH-5791-01	12.3594	Tumor			12.9537
TCGA-V1-A9OX-01	12.3589	Tumor			12.0093
TCGA-V1-A9O5-01	14.5907	Tumor			11.6675
TCGA-HC-8216-01	13.0957	Tumor			12.8407
TCGA-V1-A9OA-01	12.1327	Tumor			12.3588
TCGA-KC-A4BL-01	11.8769	Tumor			13.0887
TCGA-YL-A8SA-01	13.0599	Tumor			12.0076
TCGA-ZG-A9L9-01	11.5614	Tumor			13.178
TCGA-HC-7077-01	13.0248	Tumor			12.1168
TCGA-J4-A67R-01	11.8394	Tumor			11.6401
TCGA-HC-7737-01	11.8363	Tumor			12.4785
TCGA-VP-A87K-01	11.7401	Tumor			11.4313
TCGA-J9-A52B-01	11.9742	Tumor			13.4462
TCGA-V1-A8MG-01	12.5859	Tumor			12.4473
TCGA-KK-A8IM-01	12.5716	Tumor			12.7714
TCGA-EJ-AB27-01	12.8478	Tumor			12.2478
TCGA-EJ-5504-01	12.0727	Tumor			13.1979
TCGA-G9-6377-01	12.8002	Tumor			12.4042
TCGA-HC-7742-01	13.373	Tumor			12.4503
TCGA-EJ-A7NK-01	11.662	Tumor			14.4834
TCGA-HC-7213-01	13.3609	Tumor			13.0831
TCGA-KK-A7AZ-01	12.9476	Tumor			12.3533
TCGA-EJ-7330-01	12.1715	Tumor			12.9897
TCGA-KK-A8IC-01	12.3043	Tumor			12.2175
TCGA-ZG-A9LN-01	13.1262	Tumor			12.0038
TCGA-KK-A59Y-01	12.6052	Tumor			13.4348
TCGA-HC-A76W-01	12.7743	Tumor			11.0485
TCGA-KC-A7F5-01	12.6716	Tumor			12.4729
TCGA-VN-A88L-01	11.7232	Tumor			11.2367
TCGA-KK-A8IB-01	12.4423	Tumor			12.3292
TCGA-HC-7818-01	13.0541	Tumor			12.1487
TCGA-EJ-A46E-01	11.0721	Tumor			12.5929
TCGA-HC-7745-01	11.9582	Tumor			12.0849
TCGA-EJ-5506-01	12.0537	Tumor			10.8783
TCGA-V1-A8WL-01	12.7675	Tumor			12.2245
TCGA-KK-A8I6-01	12.2819	Tumor			10.9022
TCGA-TP-A8TT-01	12.1908	Tumor			11.4944
TCGA-G9-6499-01	12.0302	Tumor			12.1885
TCGA-HC-A6AN-01	12.4423	Tumor			12.5214
TCGA-VP-A87C-01	11.7428	Tumor			11.4509
TCGA-EJ-5496-01	12.4083	Tumor			12.8929
TCGA-KK-A6E6-01	12.8468	Tumor			12.552
TCGA-EJ-7781-01	12.9467	Tumor			11.9496
TCGA-HI-7169-01	10.6046	Tumor			13.3546
TCGA-J4-A67N-01	11.763	Tumor			11.8033
TCGA-HC-A48F-01	11.0892	Tumor			12.3647
TCGA-G9-6371-01	12.585	Tumor			11.6061
TCGA-EJ-7794-01	12.3101	Tumor			10.3971
TCGA-YL-A9WH-01	13.0308	Tumor			11.523
TCGA-V1-A9ZR-01	11.8633	Tumor			10.916
TCGA-ZG-A9LZ-01	12.538	Tumor			13.0968
TCGA-HC-A9TH-01	12.9537	Tumor
TCGA-V1-A9O7-01	12.0093	Tumor
TCGA-HC-A6HY-01	11.6675	Tumor
TCGA-CH-5739-01	12.8407	Tumor
TCGA-XK-AAIV-01	12.3588	Tumor
TCGA-J4-A6G3-01	13.0887	Tumor
TCGA-KC-A7FA-01	12.0076	Tumor
TCGA-HC-7749-01	13.178	Tumor
TCGA-HC-8258-01	12.1168	Tumor
TCGA-HC-7079-01	11.6401	Tumor
TCGA-2A-A8VO-01	12.4785	Tumor
TCGA-M7-A71Z-01	11.4313	Tumor
TCGA-EJ-7788-01	13.4462	Tumor
TCGA-KK-A8I4-01	12.4473	Tumor
TCGA-XJ-A83G-01	12.7714	Tumor
TCGA-YL-A9WX-01	12.2478	Tumor
TCGA-J4-A67L-01	13.1979	Tumor
TCGA-2A-AAYF-01	12.4042	Tumor
TCGA-EJ-5505-01	12.4503	Tumor
TCGA-V1-A9ZK-01	14.4834	Tumor
TCGA-XJ-A9DX-01	13.0831	Tumor
TCGA-V1-A9OY-01	12.3533	Tumor
TCGA-VN-A88O-01	12.9897	Tumor
TCGA-EJ-A46F-01	12.2175	Tumor
TCGA-G9-6373-01	12.0038	Tumor
TCGA-VN-A88R-01	13.4348	Tumor
TCGA-G9-6379-01	11.0485	Tumor
TCGA-CH-5737-01	12.4729	Tumor
TCGA-VP-A87B-01	11.2367	Tumor
TCGA-HC-A8D1-01	12.3292	Tumor
TCGA-J4-A83L-01	12.1487	Tumor
TCGA-V1-A8WW-01	12.5929	Tumor
TCGA-EJ-A8FO-01	12.0849	Tumor
TCGA-QU-A6IN-01	10.8783	Tumor
TCGA-FC-7708-01	12.2245	Tumor
TCGA-YL-A8SH-01	10.9022	Tumor
TCGA-KC-A7FE-01	11.4944	Tumor
TCGA-V1-A8ML-01	12.1885	Tumor
TCGA-HC-A6AQ-01	12.5214	Tumor
TCGA-H9-A6BY-01	11.4509	Tumor
TCGA-KK-A6E8-01	12.8929	Tumor
TCGA-HC-A6AP-01	12.552	Tumor
TCGA-EJ-7317-01	11.9496	Tumor
TCGA-YL-A8S9-01	13.3546	Tumor
TCGA-KK-A8IA-01	11.8033	Tumor
TCGA-G9-6356-01	12.3647	Tumor
TCGA-YL-A8SO-01	11.6061	Tumor
TCGA-J4-A67Q-01	10.3971	Tumor
TCGA-KK-A6E4-01	11.523	Tumor
TCGA-KK-A7B0-01	10.916	Tumor
TCGA-EJ-5511-01	13.0968	Tumor
